# Supplementary material for: Prevention of occupational dysphonia in scientific university personnel: A cross-sectional study
Source: Springer Nature journal article supplement (doi:10.1007/s10389-022-01805-0), 2023-01-13
Supplement: MOESM1 [file 23920278]

## **WELCOME!**

Please take a few minutes. Thank you for your willingness to participate in my questionnaire study on the topic: „**Prevention of voice disorders in university personnel**“.

The data you enter will be stored according to the input fields. The responsible person is Mrs. Christiane Lücking. Your data will only be passed on to third parties in anonymous form for scientific purposes. Should the purpose of the storage have finally ceased to exist, all your data will be deleted. For the rest the Federal Data Protection Act applies. Cancellation of the questionnaire is possible at any time without giving reasons.

By clicking on the button below (Continue) you declare your consent to the storage and use of the data in this questionnaire.

## **SOCIODEMOGRAPHICS AND OCCUPATION**

### **1. First of all, we would like to ask you for some information about yourself.**

You are:  Male  
 Female  
 Diverse

How old are you? \_\_\_\_\_ years

### **2. To which professional group of the university do you belong?**

- Teaching university staff
- Administrative university staff
- Neither teaching nor administrative university staff

### **3. Please specify your function:**

- Professor
- Research assistant
- Others: \_\_\_\_\_

### **4. Please indicate your work experience at the university.**

\_\_\_\_\_ years

## QUESTIONS ONLY FOR TEACHING STAFF

**5. How large are the groups of students you teach?**

- very small (1 bis 20 persons)
- small (21 bis 40 persons)
- middle (41 bis 60 persons)
- large (61 bis 80 persons)
- very large (81 bis 100 persons)
- others (which?): \_\_\_\_\_

**6. How many times a week do you usually teach (on average)?**

- one time a week
- two times a week
- three times a week
- four times a week
- daily a week
- others: \_\_\_\_\_

**7. Do you use technical aids (microphone, audio system, headset) for your teaching?**

- never
- rarely
- sometimes
- often
- always

**8. How do you teach?**

- being present
- virtual
- hybrid solution (virtual and present)

**9. How long do you usually teach in a day? (Duration of teaching units (TU) á 45 min)**

- 2 TU
- more than 2 TU
- more than 4 TU
- more than 6 TU
- more than 8 TU
- others: \_\_\_\_\_

**10. Have you had a vocal aptitude test with an ENT doctor (Ear Nose and Throat Doctor)/ Otorhinolaryngologist/ Phoniatriest before you began teaching?**

- Yes
- No

**11. Have you attended in further education or training in the field of voice within your university work?**

- Yes. Which? \_\_\_\_\_
- No

**12. Do you know so-called "first aid measures" for the voice?**

- Yes. Which? \_\_\_\_\_
- No. I am not aware of any.

**13. What would you like your employer to do to preserve your good voice?**

Please enter your ideas and suggestions here. Use one per line per comment for this.

---

---

## VOICE PROFILE

**14. Does your voice sound unpleasantly rough, hoarse or scratchy?**

Please refer to your daily work routine only!

- never
- rarely
- sometimes
- often
- always

**15. Does your voice suddenly fail you when you speak?**

Please refer to your daily work routine only!

- never
- rarely
- sometimes
- often
- always

**16. Do you feel like the sound of your voice is uncontrollable?**

Please refer to your daily work routine only!

- never
- rarely
- sometimes
- often
- always

**17. Do you have the feeling of mucus in your throat?**

Please refer to your daily work routine only!

- never
- rarely
- sometimes
- often
- always

**18. Do you have to clear your throat or cough when you speak?**

Please refer to your daily work routine only!

- never
- rarely
- sometimes
- often
- always

**19. Do you feel general strain throughout your body when you speak?**

Please refer to your daily work routine only!

- never
- rarely
- sometimes
- often
- always

**20. Does the sound of your voice change over the course of the day?** Please refer to your daily work routine only!

- never
- rarely
- sometimes
- often
- always

## VOICE ACTIVITIES WITH SINGING AND MODULATION

**21. Are you difficult to understand on the phone?**

Please refer to your daily work routine only!

- never
- rarely
- sometimes
- often
- always

**22. Do you have problems speaking in front of groups because of your voice?**

Please refer to your daily work routine only!

- never
- rarely
- sometimes
- often
- always

**23. Does singing cause you vocal difficulties?**

Please refer to your daily work routine only!

- never
- rarely
- sometimes
- often
- always

**24. Do you have difficulty modulating the sound of your voice?**

Please refer to your daily work routine only!

- never
- rarely
- sometimes
- often
- always

**25. Do you feel that speaking for a long time is a strain on your voice?**

Please refer to your daily work routine only!

- never
- rarely
- sometimes
- often
- always

**26. Do you find it difficult to adapt vocally to different conversational partners and / or situations?**

Please refer to your daily work routine only!

- never
- rarely
- sometimes
- often
- always

**27. Does the rapid change from singing or calling and speaking cause you difficulties?**

Please refer to your daily work routine only!

- never
- rarely
- sometimes
- often
- always

**28. Do you have problems performing certain activities because of your voice?**

Please refer to your daily work routine only!

- never
- rarely
- sometimes
- often
- always



## ACTIVITY AND PARTICIPATION

**29. Do you avoid making phone calls because of your voice?**

Please refer to your daily work routine only!

- never
- rarely
- sometimes
- often
- always

**30. Do you avoid speaking in front of groups because of your voice?**

Please refer to your daily work routine only!

- never
- rarely
- sometimes
- often
- always

**31. Do you avoid singing because of your voice?**

Please refer to your daily work routine only!

- never
- rarely
- sometimes
- often
- always

**32. Do you avoid situations that require special vocal expression because of your voice?**

Please refer to your daily work routine only!

- never
- rarely
- sometimes
- often
- always

**33. Do you avoid long speaking engagements because of your voice?**

Please refer to your daily work routine only!

- never
- rarely
- sometimes
- often
- always

**34. Do you avoid changing communication partners and/or situations because of your voice?**

Please refer to your daily work routine only!

- never
- rarely
- sometimes
- often
- always

**35. Do you avoid certain activities that your job actually requires because of your voice?**

Please refer to your daily work routine only!

- never
- rarely
- sometimes
- often
- always

## ENVIROMENTAL FACTORS

**36. Is background noise at work affecting your voice?**

Please refer to your daily work routine only!

- never
- rarely
- sometimes
- often
- always

**37. Does speaking in rooms with dry air at work affect your voice?**

Please refer to your daily work routine only!

- never
- rarely
- sometimes
- often
- always

**38. Do poor spatial acoustics in the workplace affect your voice?**

Please refer to your daily work routine only!

- never
- rarely
- sometimes
- often
- always

**39. Is a lack of vocal rest breaks at work affecting your voice?**

Please refer to your daily work routine only!

- never
- rarely
- sometimes
- often
- always

**40. Does your posture at work affect your voice?**

Please refer to your daily work routine only!

- never
- rarely
- sometimes
- often
- always

## PERSONAL FACTORS

**41. Are you nervous and tense about your voice when you speak at work?**

Please refer to your daily work routine only!

- never
- rarely
- sometimes
- often
- always

**42. Are you ashamed of your voice?**

Please refer to your daily work routine only!

- never
- rarely
- sometimes
- often
- always

**43. Do you feel less competent at work because of your voice?**

- never
- rarely
- sometimes
- often
- always

**44. Have you already sought medical-therapeutic help for voice problems?**

- never
- rarely
- sometimes
- often
- always

**45. Have you had to call in sick due to voice problems?**

- never
- rarely
- sometimes
- often
- always

**46. Do you smoke?**

- Yes, how many cigarettes usually a day?

- 
- No, I do not smoke.

**47. Do you drink alcohol?**

- never
- rarely
- sometimes
- often
- always

**48. Can you sleep well and enough?**

- never
- rarely
- sometimes
- often
- always

**END**

Thank you very much for your cooperation! I will be happy to inform you about the results of the study on request. Simply send me an e-mail.

Kind regards, Christiane Lücking
